# Supplementary material for: Homogenizing and estimating the uncertainty in NOAA's long-term vertical ozone profile records measured with the electrochemical concentration cell ozonesonde
Source: Copernicus journal article supplement (doi:10.5194/amt-11-3661-2018), 2018-06-26
Supplement: Supplementary file 1 [file amt-11-3661-2018-supplement.pdf]

Supplement of Atmos. Meas. Tech., 11, 3661–3687, 2018  
<https://doi.org/10.5194/amt-11-3661-2018-supplement>  
© Author(s) 2018. This work is distributed under  
the Creative Commons Attribution 4.0 License.

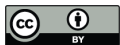

*Supplement of*

## **Homogenizing and estimating the uncertainty in NOAA's long-term vertical ozone profile records measured with the electrochemical concentration cell ozonesonde**

**Chance W. Sterling et al.**

*Correspondence to:* Chance W. Sterling ([chance.sterling@noaa.gov](mailto:chance.sterling@noaa.gov))

The copyright of individual parts of the supplement might differ from the CC BY 4.0 License.

Supplemental Material

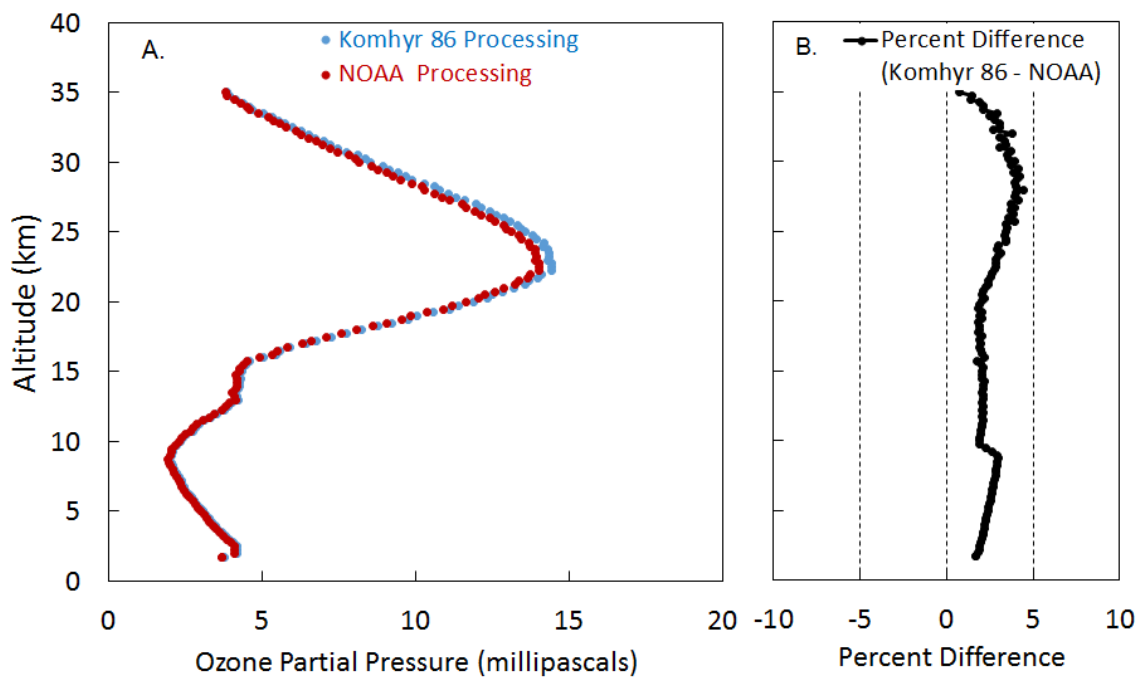

Figure S1: Average Boulder profile for Era 3 processed with the 1986 Komhyr processing and the NOAA ozone sensor efficiency processing techniques, Panel A. The percent difference in the two processing is shown in Panel B.

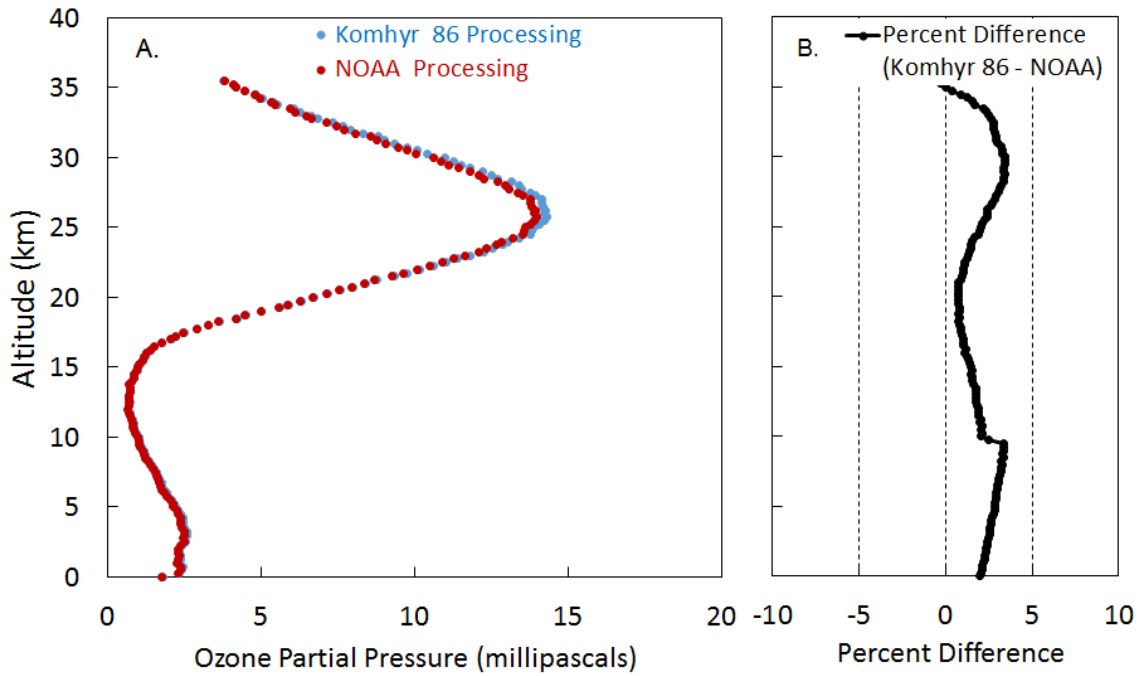

Figure S2: Average Hilo profile for Era 3 processed with the 1986 Komhyr correction and the NOAA ozone sensor efficiency correction, Panel A. The percent difference in the two processing is shown in Panel B.

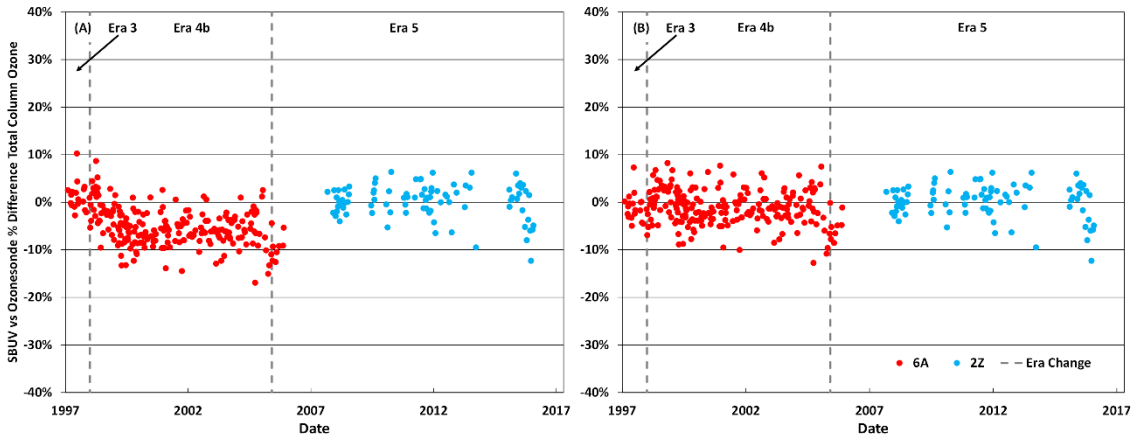

Figure S3: Suva, Fiji SBUV vs Ozone sonde total column ozone comparison before (A) and after (B) applying ozone sensor efficiency.

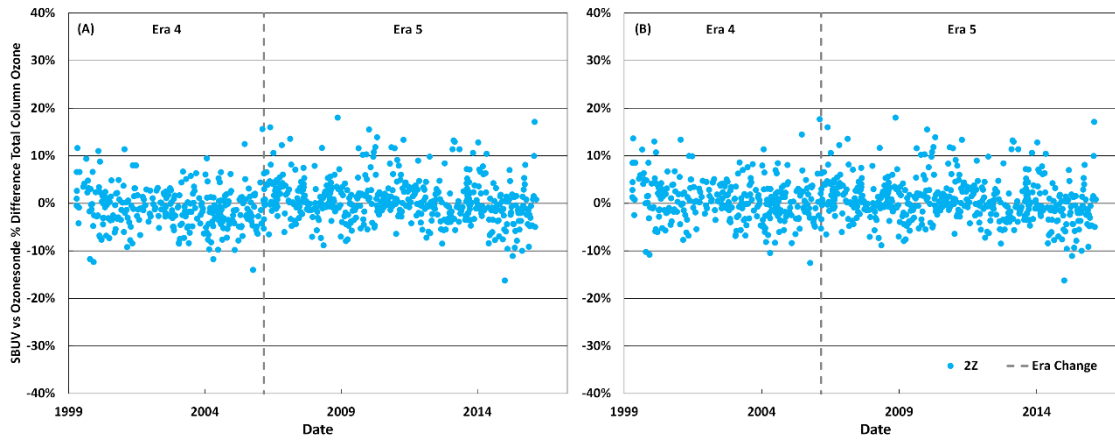

**Figure S4: Huntsville, Alabama SBUV vs Ozonesonde total column ozone comparison before (A) and after (B) applying the ozone sensor efficiency.**

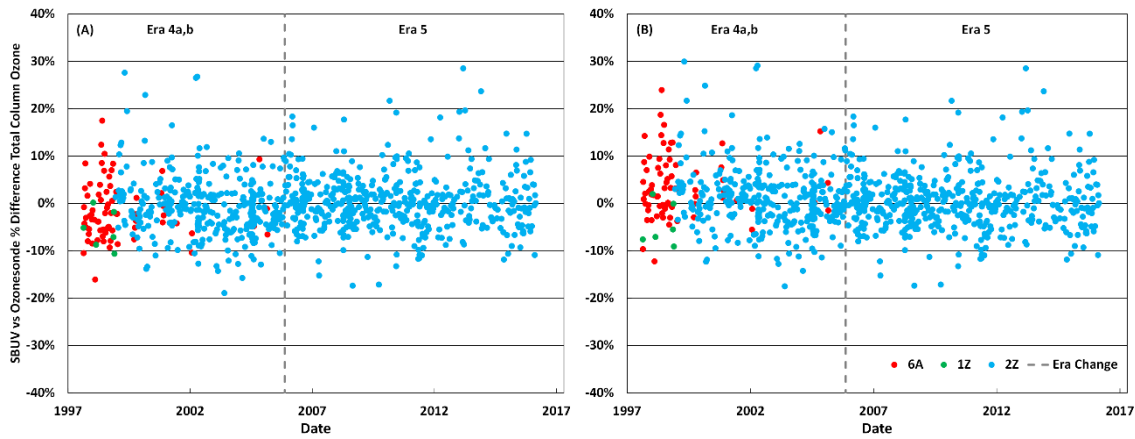

5

**Figure S5: Trinidad Head, California SBUV vs Ozonesonde total column ozone comparison before (A) and after (B) applying the ozone sensor efficiency.**

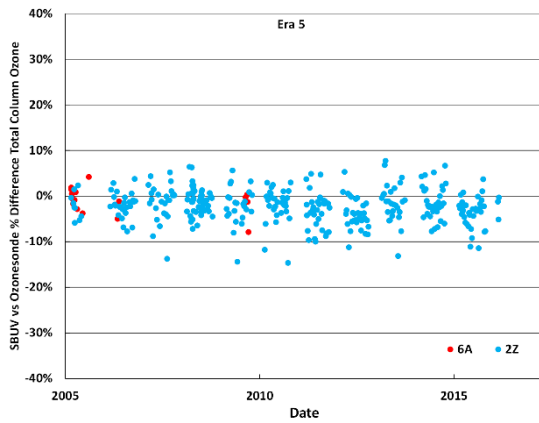

Figure S6: Summit, Greenland SBUV vs Ozonesonde total column ozone comparison after applying ozone sensor efficiency.

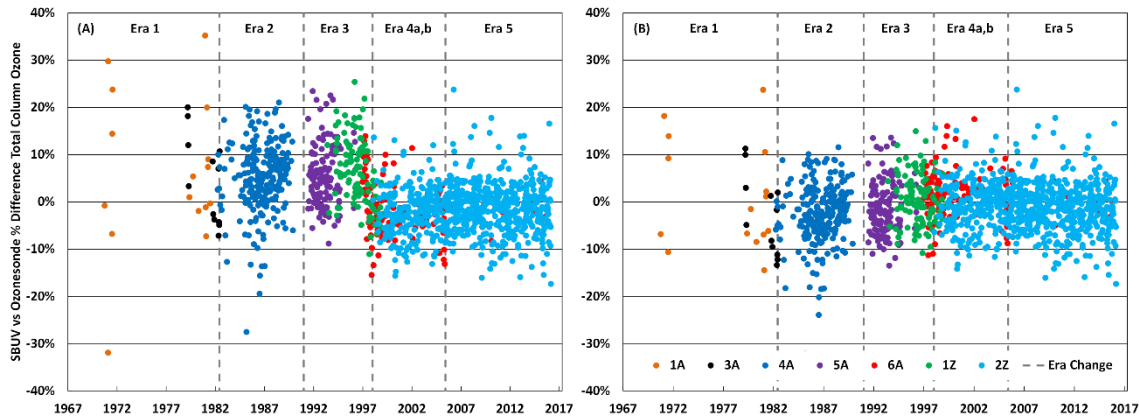

Figure S7: Boulder, CO SBUV vs Ozonesonde total column ozone comparison before (A) and after (B) applying ozone sensor efficiency.

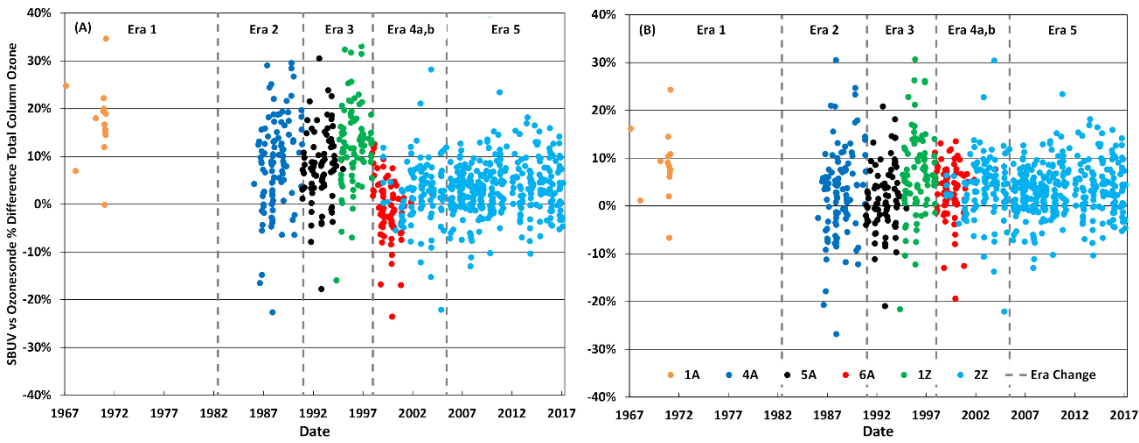

5

Figure S8: South Pole Dobson vs Ozonesonde total column ozone comparison before (A) and after (B) applying ozone sensor efficiency.

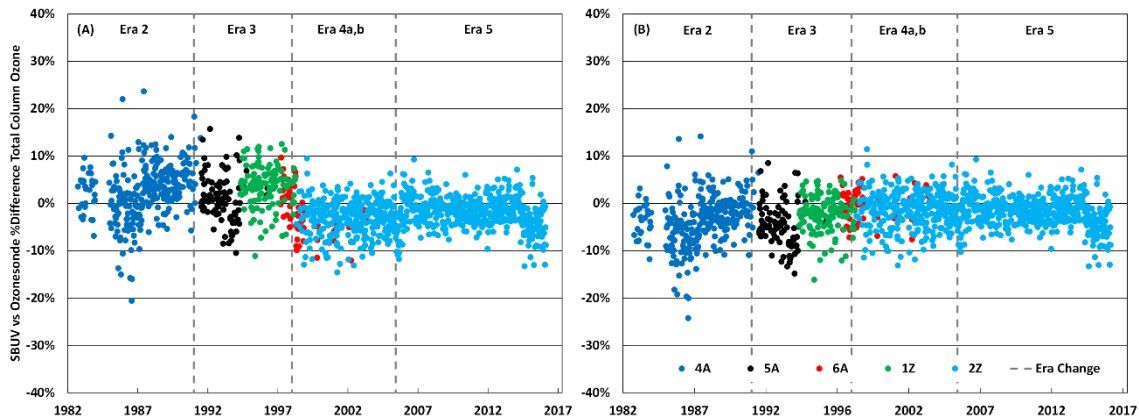

4

**Figure S9: Hilo, HI SBUV vs Ozoneonde total column ozone comparison before (A) and after (B) applying ozone sensor efficiency.**

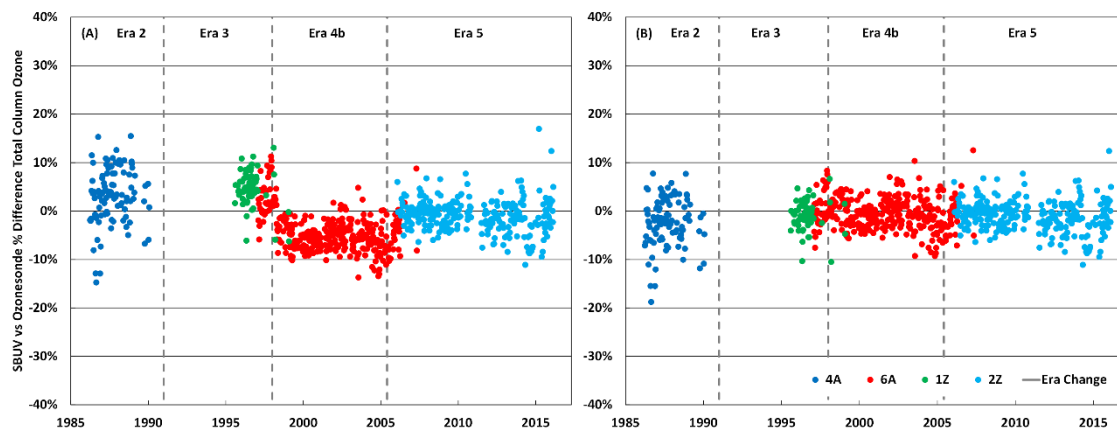

**Figure S10: Pago Pago, American Samoa SBUV vs Ozoneonde total column ozone comparison before (A) and after (B) applying ozone sensor efficiency.**
